# Supplementary material
Source: Copernicus journal article supplement (doi:10.5194/nhess-26-2673-2026)
Supplement: Supplementary file 1 [file nhess-26-2673-2026-supplement.pdf]

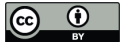

*Supplement of*

## **The Pluvial Flood Index (PFI): a new instrument for evaluating flash flood hazards and facilitating real-time warning**

**Markus Weiler et al.**

*Correspondence to:* Markus Weiler ([markus.weiler@hydrology.uni-freiburg.de](mailto:markus.weiler@hydrology.uni-freiburg.de))

The copyright of individual parts of the supplement might differ from the article licence.

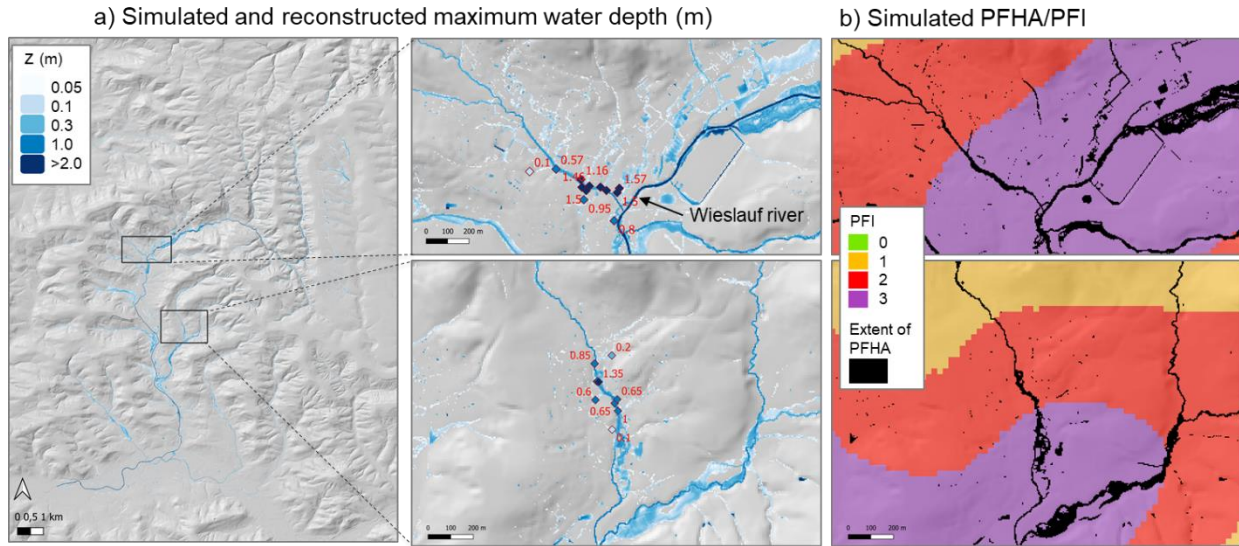

**Figure S1: Central panels: Verification of simulated maximum water depth for the flash flood event in the Wieslauf catchment at the 02.06.2024 by post event water level reconstructions based on flood marks. The corresponding PFHA/PFI regions are depicted on the right panels. The locations for which water level reconstructions are available is indicated by the squares in the left panel.**

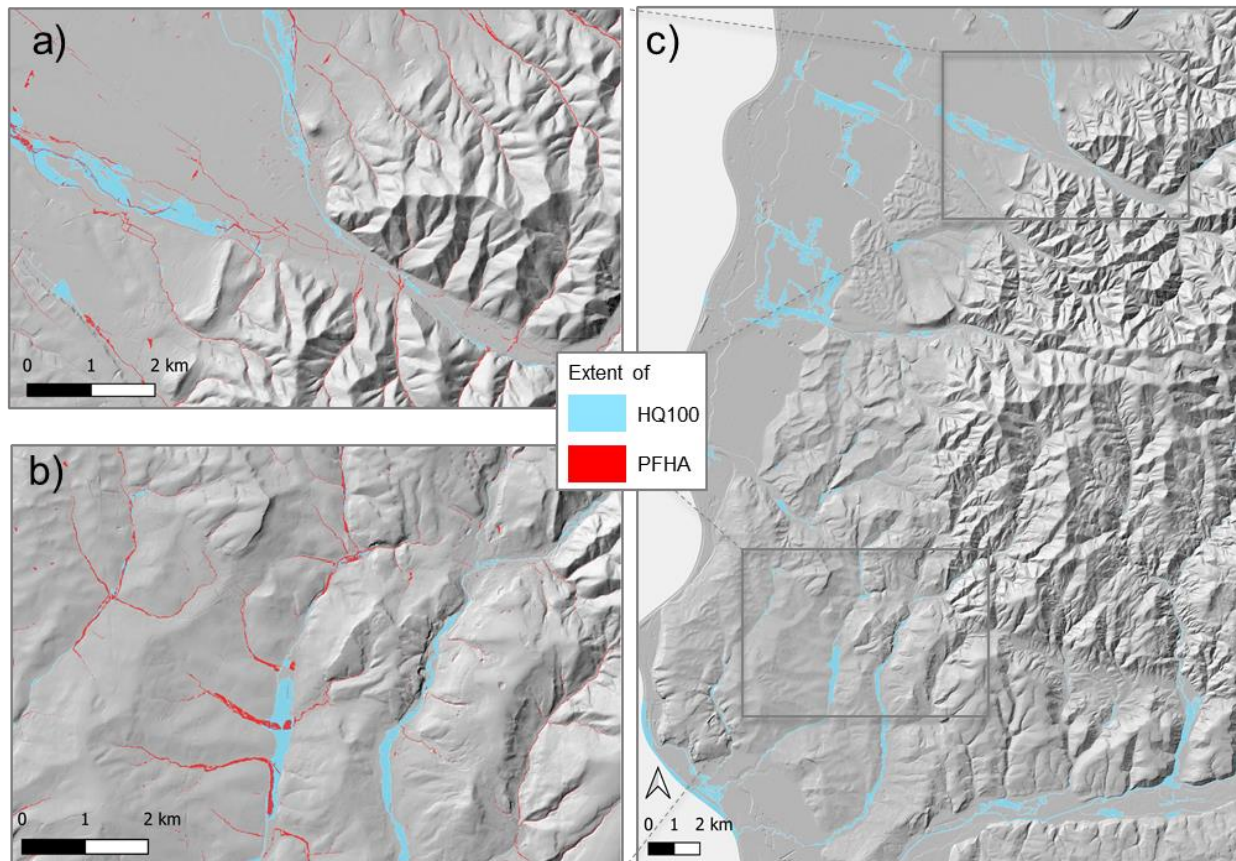

**Figure S2: a & b) Comparison of HQ100 (100 yr fluvial flood event) and PFHA (100 yr rainfall event) regions for two selected areas (see also Figure 5). c) HQ100 regions of the SW Baden-Württemberg area.**

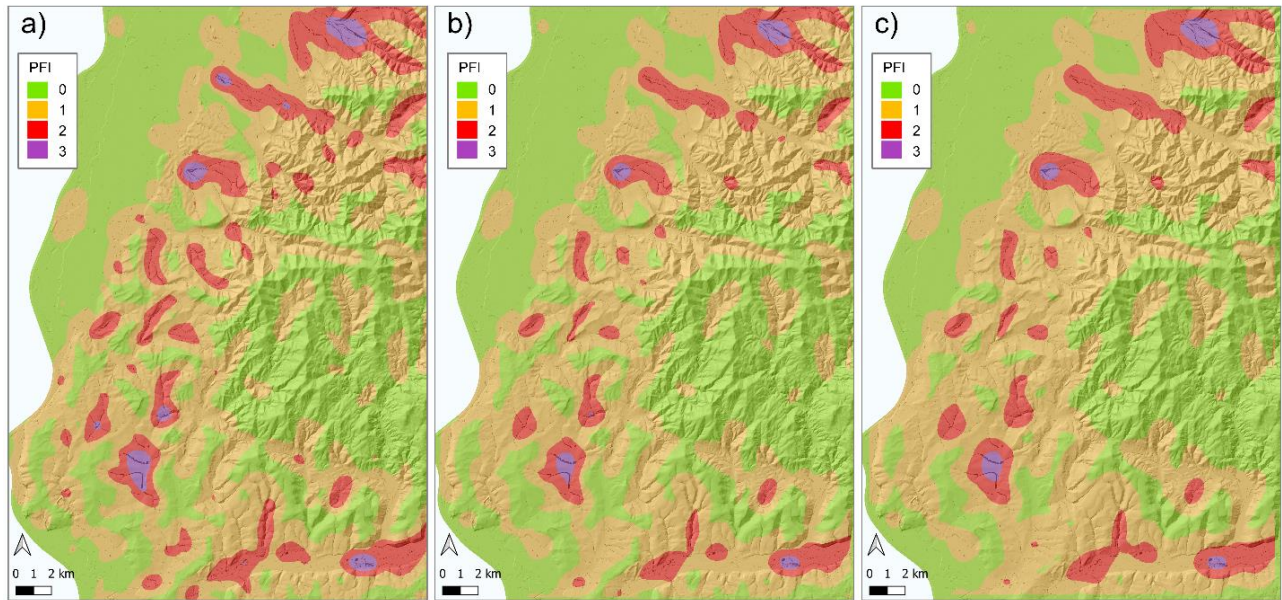

**Figure S3: Comparison of the PFI hazard map using a weighted moving circular buffer with an area of (a) 2 km<sup>2</sup>), (b) 3 km<sup>2</sup> and (c) 4 km<sup>2</sup>.**
